# Supplementary material for: Methyl substituent effect on structure, luminescence and semiconducting properties of furan/phenylene co-oligomer single crystals
Source: Royal Society of Chemistry journal article supplement (doi:10.1039/c6ce02565j), 2017-01-01
Supplement: c6ce02565j1.pdf [file c6ce02565j1.pdf]

## Electronic Supplementary Information

### Methyl Substituents Effect on Structure, Luminescent and Semiconducting Properties of Furan/Phenylene Co-oligomer Single Crystals

*Maxim S. Kazantsev\**, *Alina A. Beloborodova*, *Ekaterina S. Frantseva*, *Tatyana V. Rybalova*, *Vladislav G. Konstantinov*, *Inna K. Shundrina*, *Dmitry Yu. Paraschuk* and *Evgeny A. Mostovich*

| <b>CONTENT:</b>                                      | <b>page</b> |
|------------------------------------------------------|-------------|
| 1. Synthesis.....                                    | 2           |
| 2. Spectra of synthesized compounds .....            | 3           |
| 3. Cyclic voltammetry and optical spectroscopy ..... | 6           |
| 4. Microscopy .....                                  | 7           |
| 5. X-ray study .....                                 | 7           |
| 6. OFET data.....                                    | 9           |

## 1. Synthesis

Target compounds **4a**, **b** were synthesized according to previously described procedure (Scheme 1, Ref. 18 of the main text).

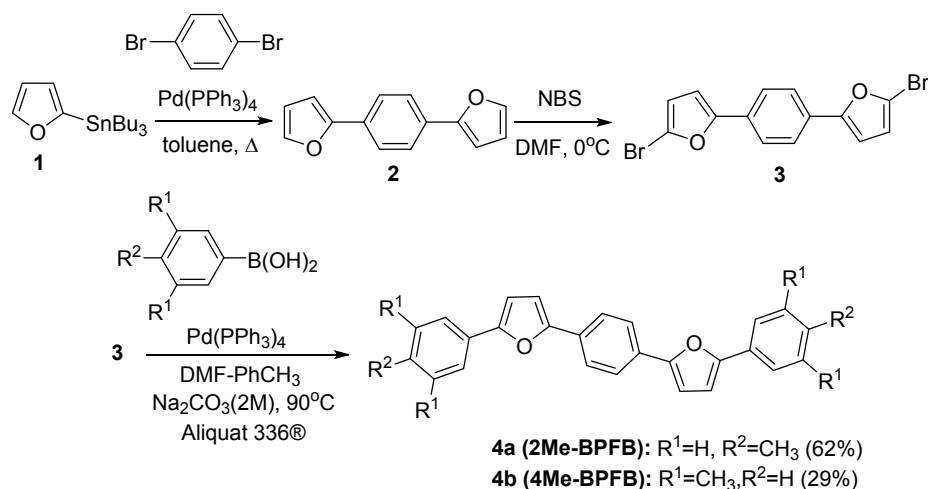

**Figure S1.** Synthesis of compounds **4a**, **b**.

### Synthesis of 1,4-bis(5-(4-methylphenyl)furan-2-yl)benzene (**4a**, 2Me-BPFB).

A mixture of 1,4-bis(5-bromofuran-2-yl)benzene **3** (300 mg, 0.815 mmol), 4-methylphenylboronic acid (244 mg, 1.8 mmol), Pd(PPh<sub>3</sub>)<sub>4</sub> (95 mg, 0.1 mmol), Na<sub>2</sub>CO<sub>3</sub>(2 M, 8 ml) and Aliquat 336® (0.1 ml) in DMF-PhCH<sub>3</sub> (1:1, 25 ml) was refluxed at 90°C for 36 h under Ar atmosphere. The precipitate formed was filtered, washed with water (3×10 ml), ethanol (3×10 ml) and hexane (3×10 ml). Vacuum sublimation at 300-310°C and 2·10<sup>-2</sup> torr gave yellow powder of **4a** (90 mg, 62%). mp 298-300°C; <sup>1</sup>H NMR (400 MHz, CDCl<sub>3</sub>) δ): 7.74 (s, 4H, -C<sub>6</sub>H<sub>4</sub>-); 7.66 (d, *J*=8.1 Hz, 4H, -C<sub>6</sub>H<sub>4</sub>-Me); 7.23 (d, *J*=8.1 Hz, 4H, -C<sub>6</sub>H<sub>4</sub>-Me); 6.76 (d, *J*=3.4 Hz, 2H, FuH); 6.71 (d, *J*=3.4 Hz, 2H, FuH); 2.37 (s, 6H, CH<sub>3</sub>); because of low solubility <sup>13</sup>C NMR was not recorded; IR (KBr) 2914; 1500; 1479; 1117; 1024; 795 cm<sup>-1</sup>; UV-vis (THF): λ<sub>max</sub> = 379 nm; HRMS (ESI) *m/z*: calcd for C<sub>28</sub>H<sub>22</sub>O<sub>2</sub>: 390.1614; found: 390.1617. Anal. calcd for C<sub>28</sub>H<sub>22</sub>O<sub>2</sub>: C, 86.13; H, 5.68; found: C, 85.97; H, 5.55.

### Synthesis of 1,4-bis(5-(3,5-dimethylphenyl)furan-2-yl)benzene (**4b**, 4Me-BPFB).

Compound **4b** was synthesized according to **4a** procedure from dibromide **3** (368 mg, 1 mmol) and (3,5-dimethylphenyl)boronic acid (330 mg, 2.2 mmol). Reaction time was 48 hr. Gradient sublimation at 310-320°C and 2·10<sup>-2</sup> torr gave yellow powder of **4b** (120 mg, 29%). mp 315-316°C; <sup>1</sup>H NMR (400 MHz, CDCl<sub>3</sub>) δ): 7.78 (s, 4H, -C<sub>6</sub>H<sub>4</sub>-); 7.39 (s, 4H, -C<sub>6</sub>H<sub>3</sub>-Me<sub>2</sub>); 6.93 (s, 2H, -C<sub>6</sub>H<sub>3</sub>-Me<sub>2</sub>); 6.74 (dd, *J*=3.3 Hz, 4H, FuH); 2.38 (s, 12H, CH<sub>3</sub>); because of low solubility <sup>13</sup>C NMR was not recorded; IR (KBr) 2916; 1601; 1545; 1485; 1026; 798 cm<sup>-1</sup>; UV-vis (THF): λ<sub>max</sub> = 379 nm; HRMS (ESI) *m/z*: calcd for C<sub>30</sub>H<sub>26</sub>O<sub>2</sub>: 418.1927; found: 418.1930. Anal. calcd for C<sub>30</sub>H<sub>26</sub>O<sub>2</sub>: C, 86.09; H, 6.26; found: C, 86.40; H, 6.44.

## 2. Spectra of synthesized compounds

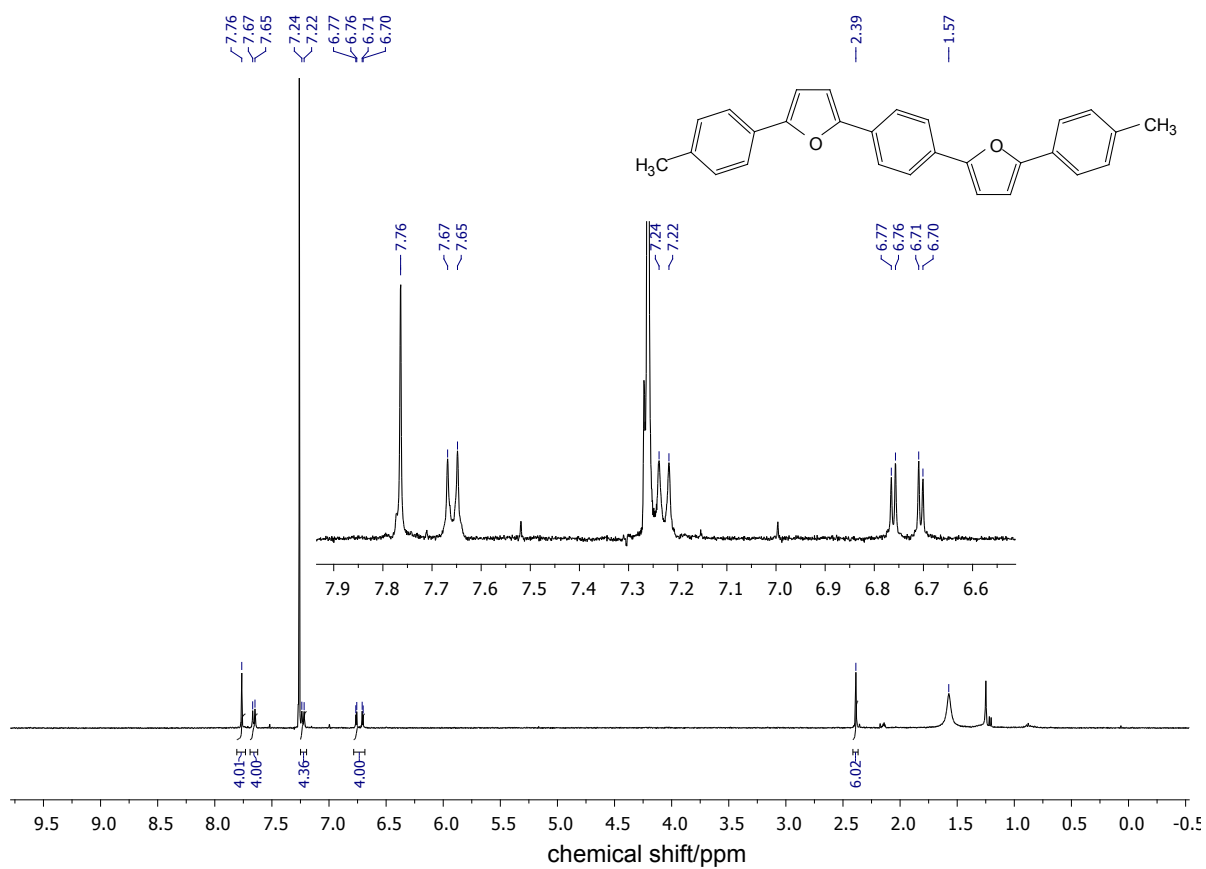

Figure S2. <sup>1</sup>H NMR spectrum of compound 4a in CDCl<sub>3</sub>.

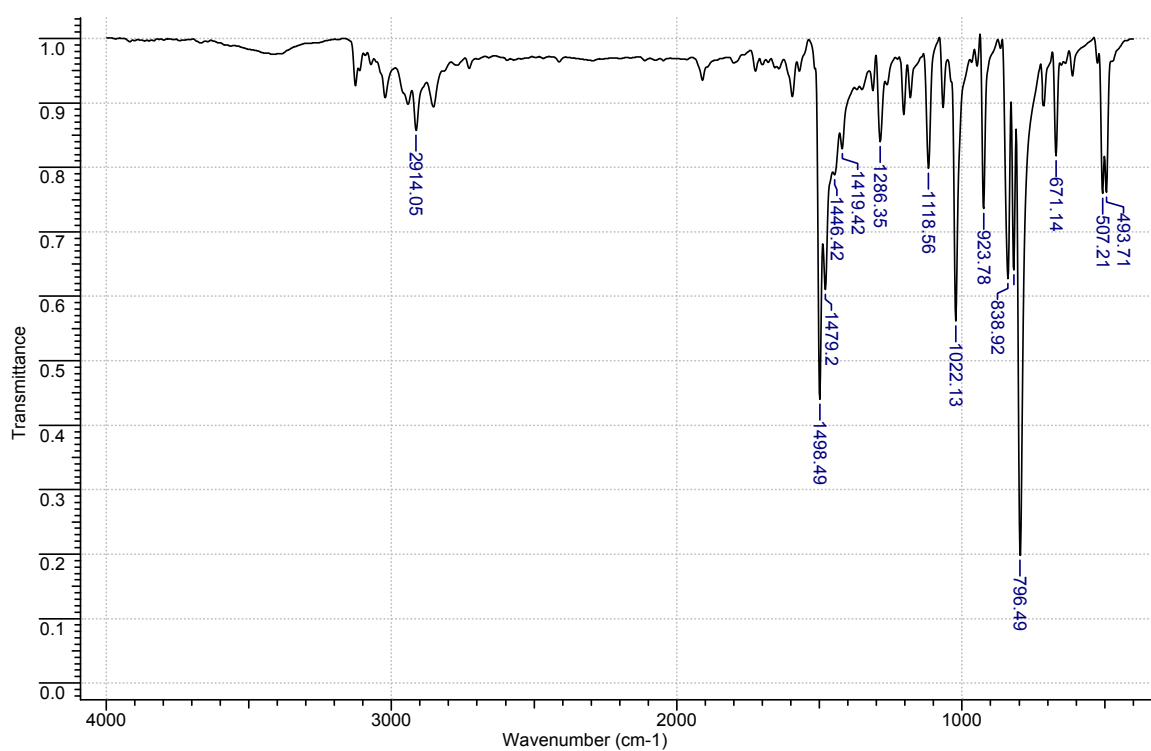

Figure S3. IR spectrum of **4a** in KBr.

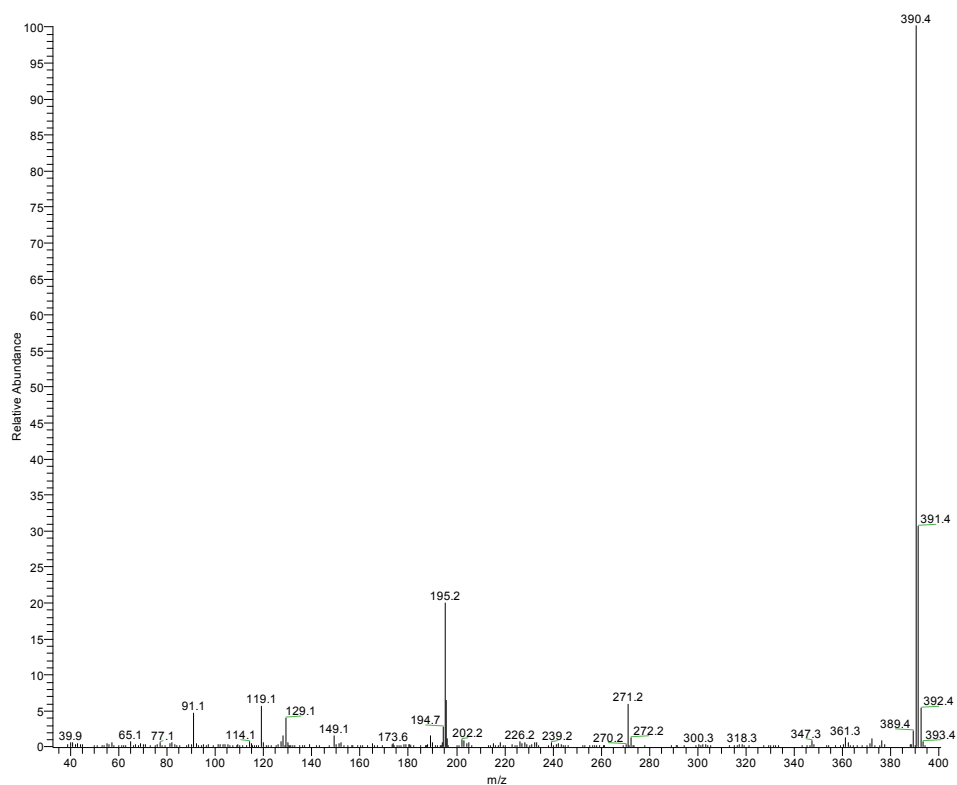

Figure S4. HRMS spectrum of compound **4a**.

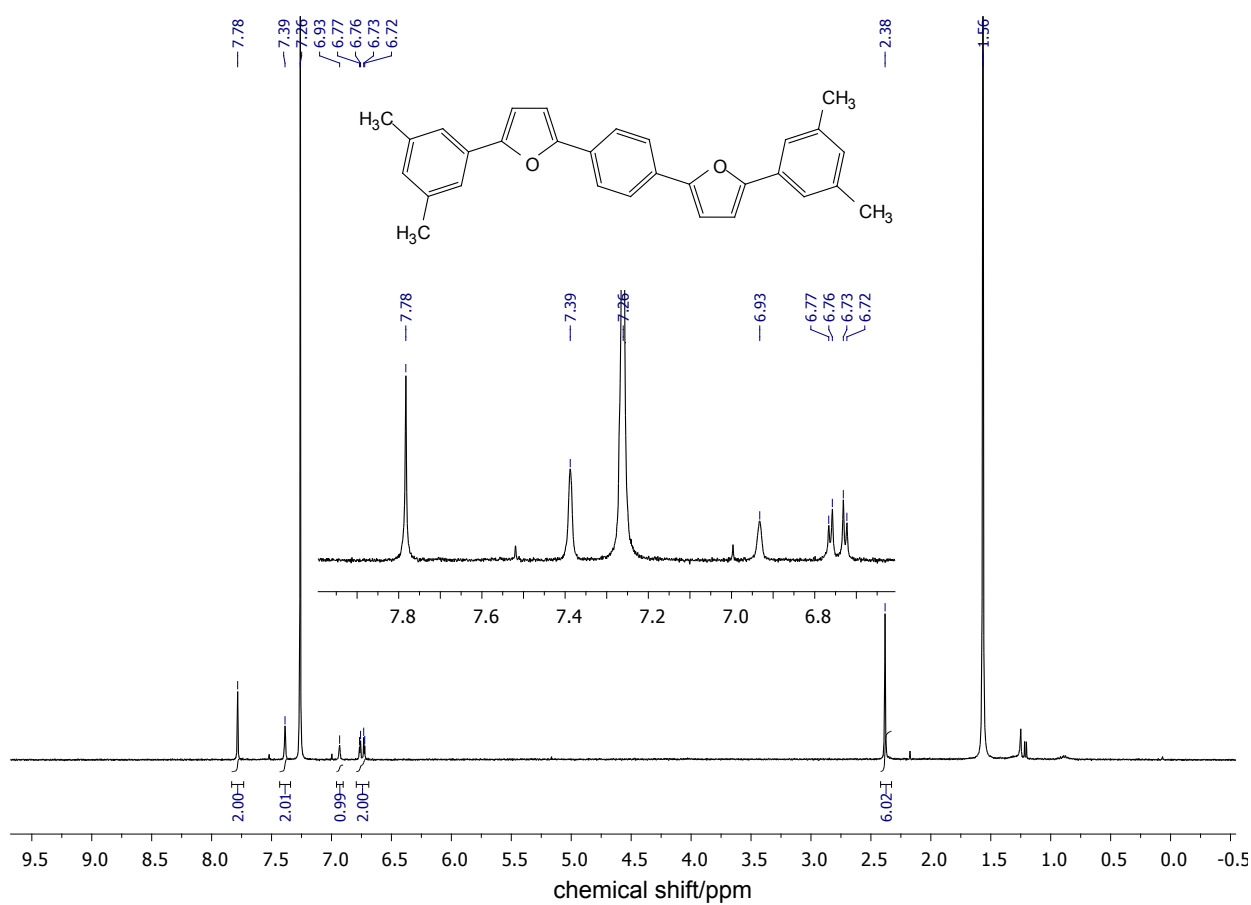

Figure S5. <sup>1</sup>H NMR spectrum of compound **4b** in CDCl<sub>3</sub>.

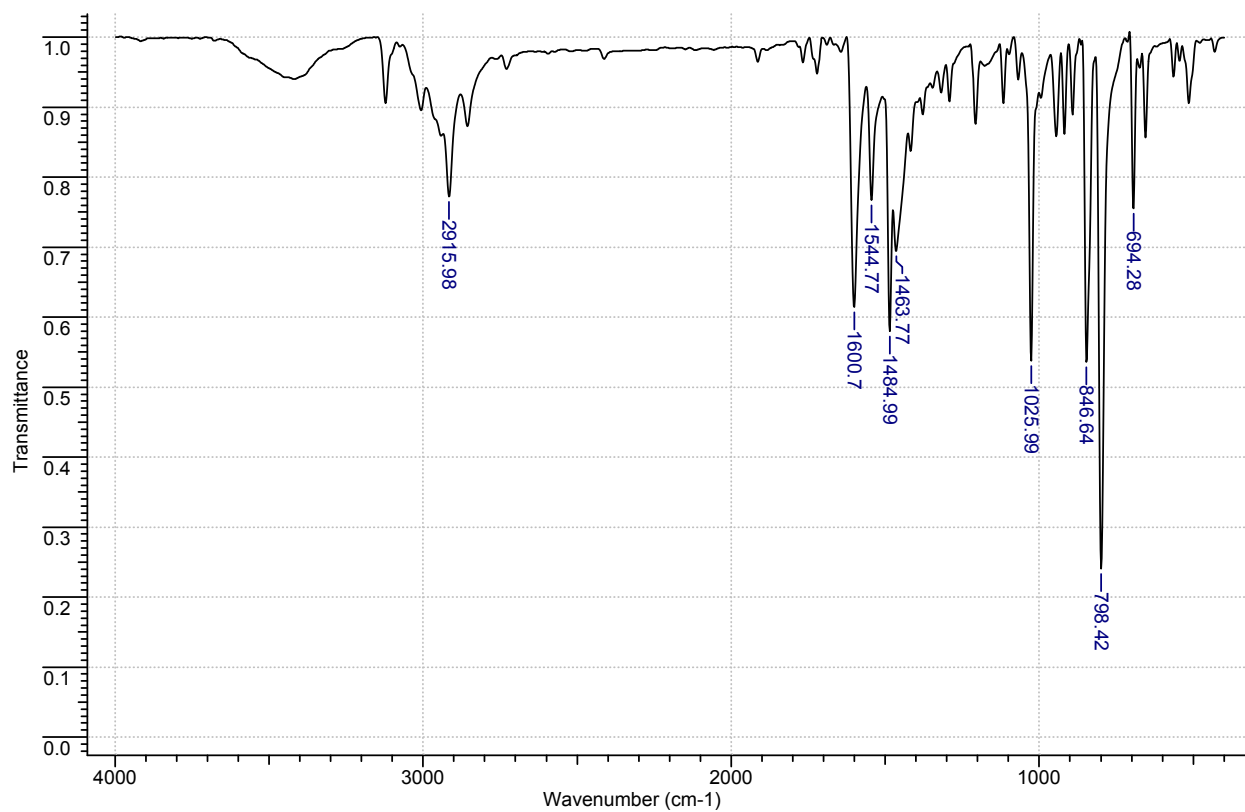

**Figure S6.** IR spectrum of **4b** in KBr.

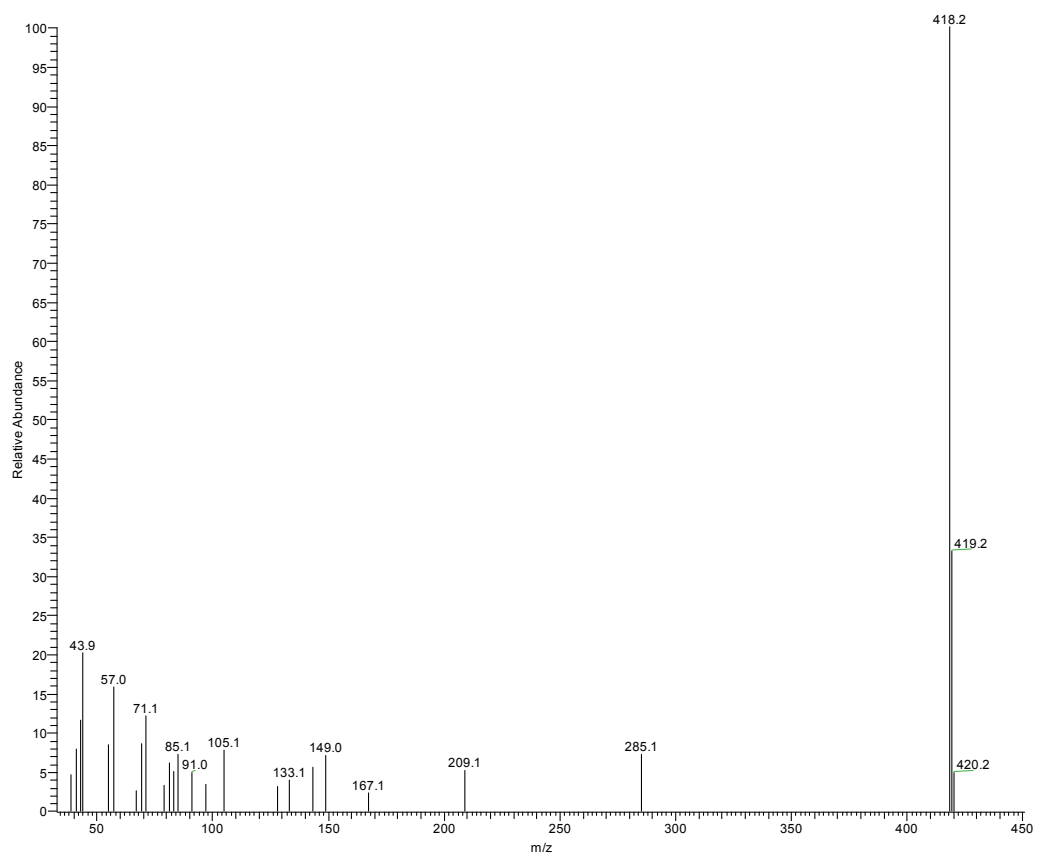

**Figure S7.** HRMS spectrum of compound **4b**.

### 3. Cyclic voltammetry and optical spectroscopy

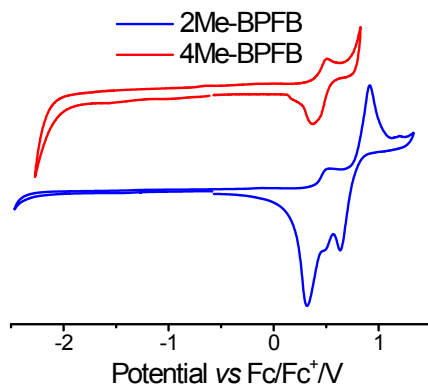

**Figure S8.** a) Cyclic voltammograms of 2Me-BPFB and 4Me-BPFB in  $\text{CH}_2\text{Cl}_2$ .

a)

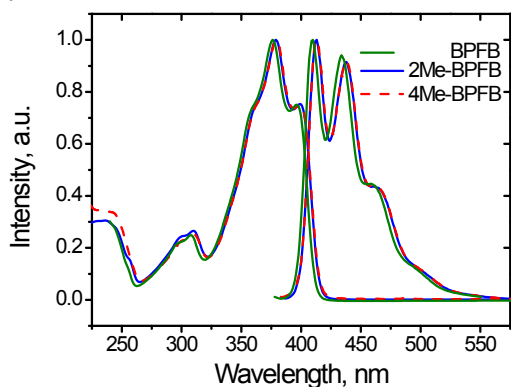

b)

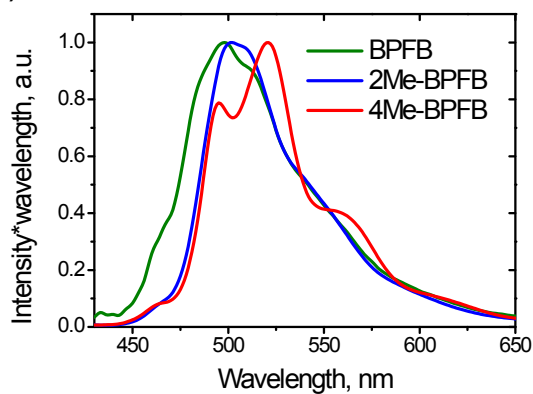

c)

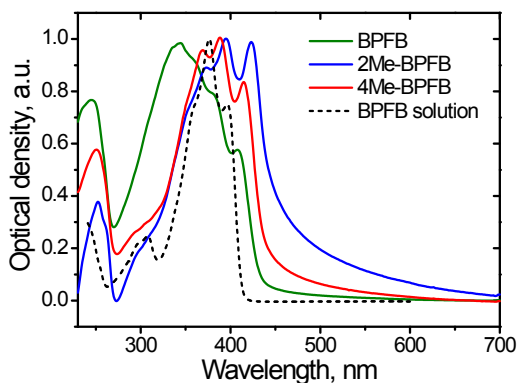

**Figure S9.** Optical spectra. a) Absorption and photoluminescence spectra of BPFB (solid olive lines), 2Me- (solid blue lines) and 4Me-BPFB (dashed red lines) in diluted THF solution; b) Photoluminescence spectra of BPFB (olive), 2Me- (blue) and 4Me-BPFB (red) single crystal; c) Optical density spectra of solid samples measured in potassium bromide pellets for BPFB (olive), 2Me-BPFB (blue) and 4Me-BPFB (red); the dark dashed line corresponds to BPFB absorption in THF solution. Note that the long-wavelength tails for the solid samples are mainly due to optical scattering from the grinded crystals.

## 4. Microscopy

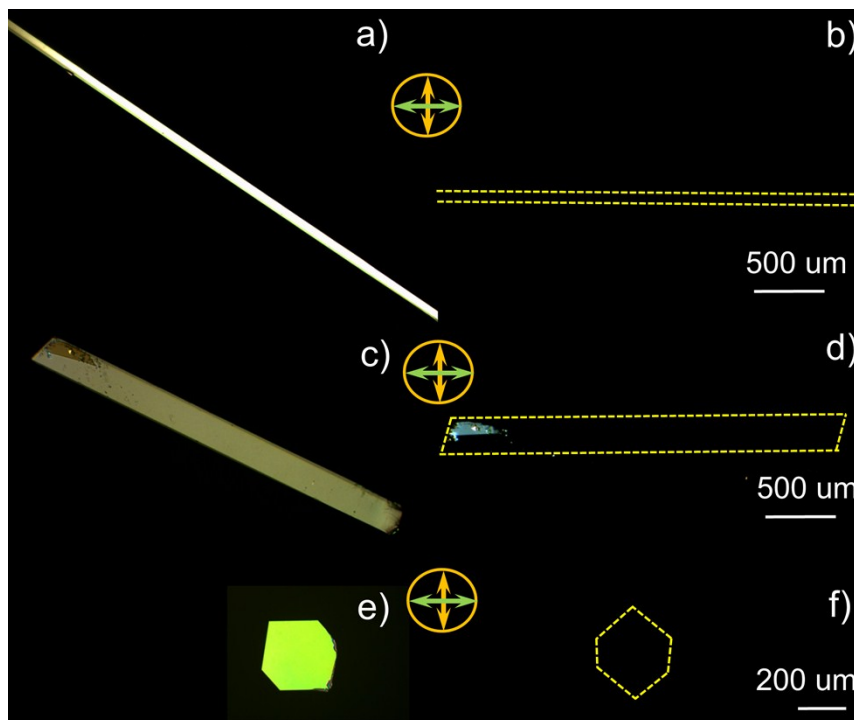

**Figure S10.** Optical images of the crystals in transmitted light through the crossed polarizers; a, b) 2Me-BPFB; c, d) 4Me-BPFB; e, f) BPFB; the arrows indicate the orientation of polarizer (orange) and analyzer (green).

## 5. X-ray study

The details of the X-ray diffraction data are as follows:

**BPFB:** light yellow rhombic plate,  $(0.60 \times 0.56 \times 0.015)$  mm<sup>3</sup>, T 200(2) K,  $D_{\text{calcd}}$  1.315 g·cm<sup>-3</sup>,  $\mu(\text{Mo-K}\alpha)$  0.082mm<sup>-1</sup>, transmission 0.7869 - 0.9280, F(000) 380, ( $\theta$  1.01 – 25.00°, completeness 96.0%), 7983 measured reflections in index range  $-24 \leq h \leq 23$ ,  $-8 \leq k \leq 8$ ,  $-7 \leq l \leq 7$ , 1550 independent ( $R_{\text{int}} = 0.0535$ ), 1115 observed ( $I > 2\sigma(I)$ ), 127 parameters,  $wR_2 = 0.1719$  (all data), GOOF 1.189, largest diff. peak and hole 0.218 and -0.307 e·Å<sup>-3</sup>. Note that the crystal structure for the vapor-grown BPFB single crystals was the same as the structure of previously reported solution-grown crystals (Ref. 18 of the main text).

**2Me-BPFB:** colorless prism,  $(0.49 \times 0.22 \times 0.12)$  mm<sup>3</sup>, T 296(2) K,  $D_{\text{calcd}}$  1.278 g·cm<sup>-3</sup>,  $\mu(\text{Mo-K}\alpha)$  0.079 mm<sup>-1</sup>, transmission 0.834 - 0.862, F(000) 412, ( $\theta$  1.96 – 26.14°, completeness 99.8%), 24301 measured reflections in index range  $-13 \leq h \leq 13$ ,  $-7 \leq k \leq 7$ ,  $-19 \leq l \leq 19$ , 2021 independent ( $R_{\text{int}} = 0.0413$ ), 1755 observed ( $I > 2\sigma(I)$ ), 137 parameters,  $wR_2 = 0.1258$  (all data), GOOF 1.157, largest diff. peak and hole 0.187 and -0.216 e·Å<sup>-3</sup>. Hydrogen positions of methyl groups in 2Me-BPFB were disordered in the ratio 75:25.

**4Me-BPFB:** yellow needle, (0.95 × 0.40 × 0.06) mm<sup>3</sup>, T 296(2) K,  $D_{\text{calcd}}$  1.245 g·cm<sup>-3</sup>,  $\mu(\text{Mo-K}\alpha)$  0.076mm<sup>-1</sup>, transmission 0.8069 - 0.8620, F(000) 444, ( $\theta$  1.54 – 25.11°, completeness 99.6%), 13206 measured reflections in index range  $-15 \leq h \leq 15$ ,  $-6 \leq k \leq 6$ ,  $-18 \leq l \leq 18$ , 1995 independent ( $R_{\text{int}}$  0.0376), 1755 observed ( $I > 2\sigma(I)$ ), 147 parameters,  $wR_2$  0.1815 (all data), GOOF 1.233, largest diff. peak and hole 0.293 and - 0.415 e.Å<sup>-3</sup>. Hydrogen positions of methyl groups in 4Me-BPFB were disordered in the ratios: 55:45 for C14- and 62:38 for C15-methyl groups.

**Table S1.** Selected crystallographic and structural data;  $\varphi_1$  and  $\varphi_2$  are the twisting angles between furan and phenyl rings (Figure 4a, main text).  $d_{\text{max}}$  is the maximal deviation of atom C10 from the average plane of  $\pi$ -system.

| Compound                             | BPFB                                           | 2Me-BPFB                                       | 4Me-BPFB                                       |
|--------------------------------------|------------------------------------------------|------------------------------------------------|------------------------------------------------|
| Empirical formula                    | C <sub>26</sub> H <sub>18</sub> O <sub>2</sub> | C <sub>28</sub> H <sub>22</sub> O <sub>2</sub> | C <sub>30</sub> H <sub>26</sub> O <sub>2</sub> |
| Crystal system                       | monoclinic                                     |                                                |                                                |
| Space group                          | $P2_1/c$                                       |                                                |                                                |
| $a$ , Å                              | 20.407(4)                                      | 11.0733(7)                                     | 13.2404(6),                                    |
| $b$ , Å                              | 7.300(1)                                       | 6.1594(3)                                      | 5.4901(2)                                      |
| $c$ , Å                              | 6.200(1)                                       | 15.850(1)                                      | 15.3541(7)                                     |
| $\beta$ , °                          | 97.773(6)                                      | 110.183(2)                                     | 90.015(2)                                      |
| $V$ , Å <sup>3</sup>                 | 915.1(3)                                       | 1014.7(1)                                      | 1116.11(8)                                     |
| $Z$                                  | 2                                              |                                                |                                                |
| final $R_1$ for ( $I > 2\sigma(I)$ ) | 0.0567                                         | 0.0355                                         | 0.0494                                         |
| density, g·cm <sup>-3</sup>          | 1.315                                          | 1.278                                          | 1.245                                          |
| tilt angle                           | 87.8                                           | 28.2                                           | 36.3                                           |
| $\varphi_1$                          | 15.3                                           | 12.7                                           | 19.3                                           |
| $\varphi_2$                          | -13.1                                          | -9.4                                           | -8.8                                           |
| $d_{\text{max}}$ , Å                 | ±0.3975                                        | ±0.3947                                        | ±0.4418                                        |
| herringbone angle, <sup>a</sup> °    | 35.8                                           | 35.4                                           | 57.1                                           |
| intradimer distance, <sup>b</sup> Å  | 4.786                                          | 6.159                                          | 5.490                                          |
| stacking angle, <sup>c</sup> °       | -                                              | 18.5                                           | 36.6                                           |

<sup>a</sup>measured between the average planes of  $\pi$ -systems; <sup>b</sup>the distance between the centers of central phenyl rings of the nearest neighboring molecules, this distance was found to correspond to b-axis for 2Me- and 4Me-BPFB; <sup>c</sup>the angle between the average plane of  $\pi$ -system and the charge transport direction (b-axis).



**Table S2.** Intermolecular C-H... $\pi$  interactions in crystals of BPFB, 2Me-BPFB and 4Me-BPFB.  $C_g$  is the aromatic ring center;  $D_{\text{pln}}$  is the nearest distance between H-atom and aromatic ring plane; Cycle1 is the furan ring; Cycle2 is the terminal phenyl ring; Cycle2\* is the terminal phenyl ring belonging to the neighboring layer; Cycle3 is the central phenyl ring (Figure 4 in the main text).

| Compound | Interaction              | H...C <sub>g</sub> , (Å) | D <sub>pln</sub> , (Å) | C-H...C <sub>g</sub> , (°) |
|----------|--------------------------|--------------------------|------------------------|----------------------------|
| BPFB     | C2-H... $\pi$ (Cycle2)   | 2.77                     | 2.75                   | 137                        |
|          | C8-H... $\pi$ (Cycle3)   | 2.82                     | 2.79                   | 136                        |
|          | C11-H... $\pi$ (Cycle2)  | 2.84                     | 2.82                   | 138                        |
| 2Me-BPFB | C2-H... $\pi$ (Cycle2*)  | 2.84                     | 2.82                   | 138                        |
|          | C8-H... $\pi$ ( Cycle2)  | 2.93                     | 2.87                   | 127                        |
|          | C11-H... $\pi$ ( Cycle3) | 2.99                     | 2.94                   | 141                        |
| 4Me-BPFB | C13-H... $\pi$ ( Cycle1) | 2.79                     | 2.79                   | 130                        |
|          | C15-H... $\pi$ ( Cycle1) | 2.87                     | 2.74                   | 151                        |
|          | C14-H... $\pi$ Cycle2)   | 2.87                     | 2.71                   | 177                        |

## 6. OFET data

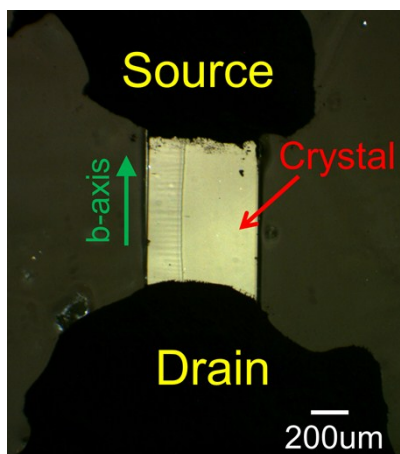

**Figure S11.** Optical image of 4Me-BPFB single crystal with painted source-drain contacts.

**Table S3.** Parameters of fabricated single-crystal OFETs.  $W$ ,  $L$  are channel width and length respectively;  $d$  and  $C$  are the thickness and capacitance of the dielectric layer, correspondingly.

| Crystal type | Sample № | $W$ [mm] | $L$ [mm] | $W/L$    | $\mu$ [cm <sup>2</sup> /Vs] | $V_{th}$ [V] |
|--------------|----------|----------|----------|----------|-----------------------------|--------------|
| BPFB         | 1        | 0.95     | 0.49     | 1.94     | 0.065                       | -19          |
|              | 2        | 2.60     | 0.78     | 3.33     | 0.13                        | -10          |
|              | 3        | 1.36     | 0.61     | 2.23     | 0.13                        | -16          |
|              |          |          |          | average: | 0.11±0.04                   | -15±4        |
| 4Me-BPFB     | 1        | 0.58     | 0.77     | 0.75     | 0.039                       | -8           |
|              | 2        | 1.36     | 0.85     | 1.60     | 0.038                       | -14          |
|              | 3        | 0.23     | 0.44     | 0.52     | 0.040                       | -20          |
|              |          |          |          | average: | 0.039±0.001                 | -14±6        |
